# Supplementary material for: Sparse canonical correlation analysis for identifying, connecting and completing gene-expression networks
Source: Springer Nature journal article supplement (doi:10.1186/1471-2105-10-315), 2009-09-28
Supplement: 12859_2009_3045_MOESM2_ESM.pdf [file 12859_2009_3045_MOESM2_ESM.pdf]

**GLIOMA**

**De Novo pathway**

Glial progenitor cell

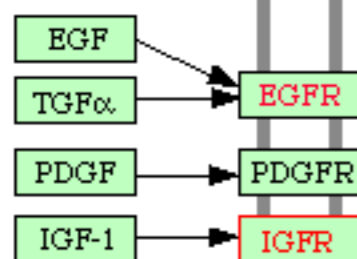

Cytokine-cytokine receptor interaction

Glial progenitor cell

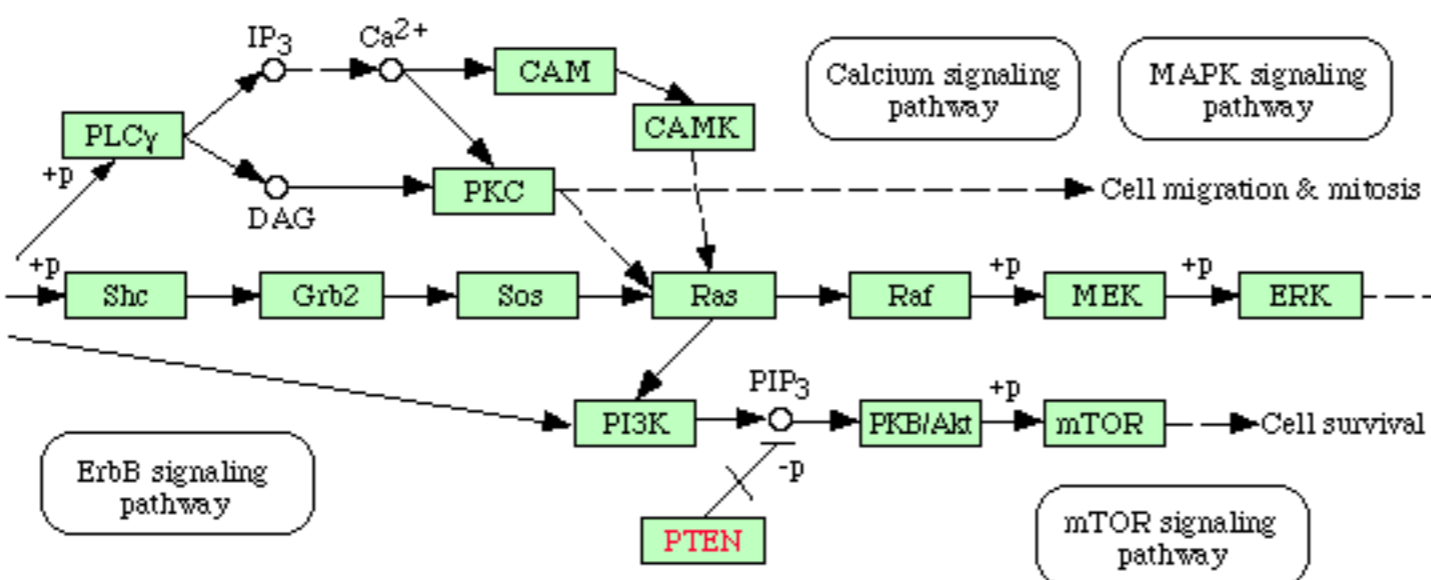

ErbB signaling pathway

Genetic alterations  
 Oncogenes : EGFR, MDM2  
 Tumor suppressors : PTEN, INK4a/ARF

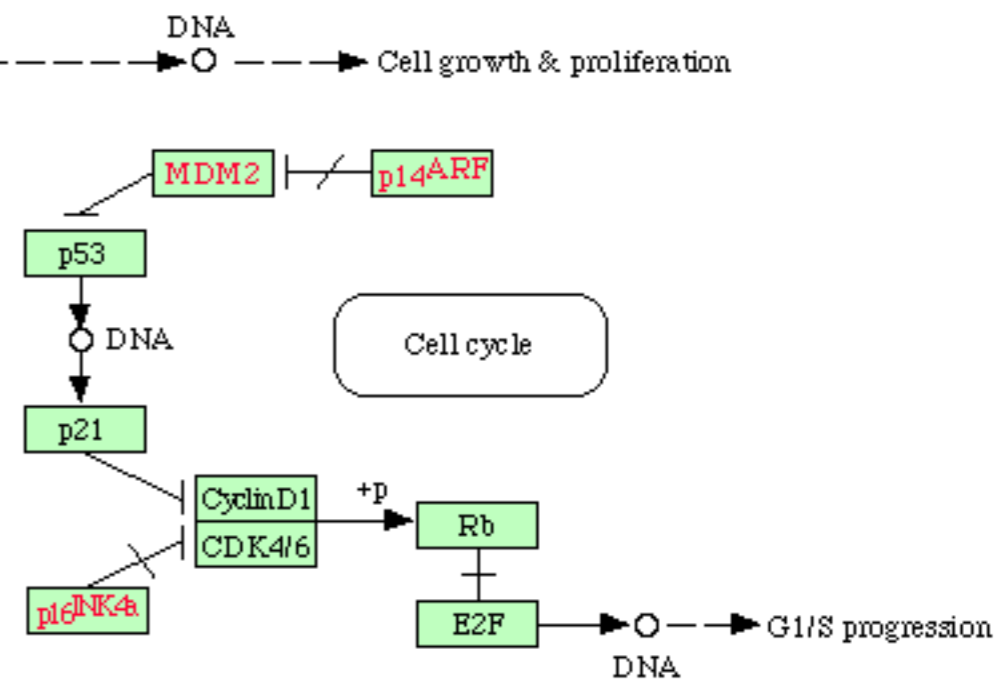

Primary GBM  
(Glioblastoma multiforme)

**Secondary pathway**

Glial progenitor cell

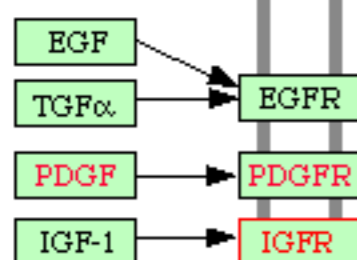

Glial progenitor cell

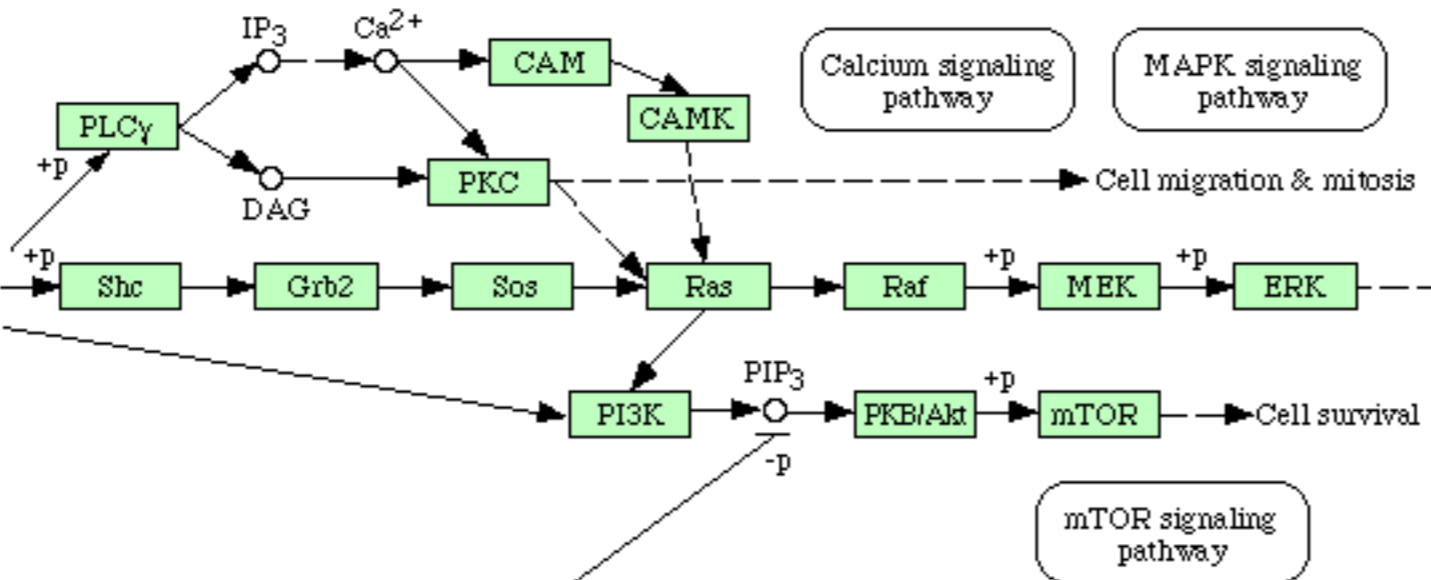

PTEN

Genetic alterations  
 Oncogenes : PDGF, PDGFR, CDK4  
 Tumor suppressors : p53, Rb, PTEN

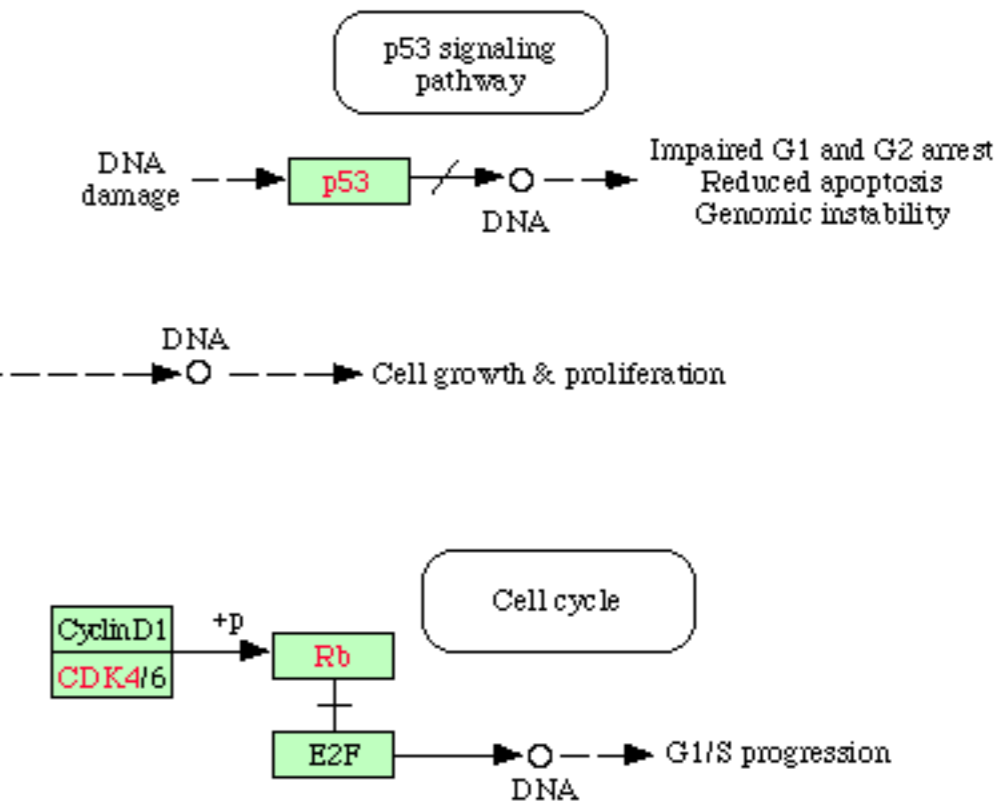

Low-grade glioma  
(WHO Grade II)

Anaplastic astrocytoma  
(WHO Grade III)

Secondary GBM  
(WHO Grade IV)
