# Supplementary material for: Sparse canonical correlation analysis for identifying, connecting and completing gene-expression networks
Source: Springer Nature journal article supplement (doi:10.1186/1471-2105-10-315), 2009-09-28

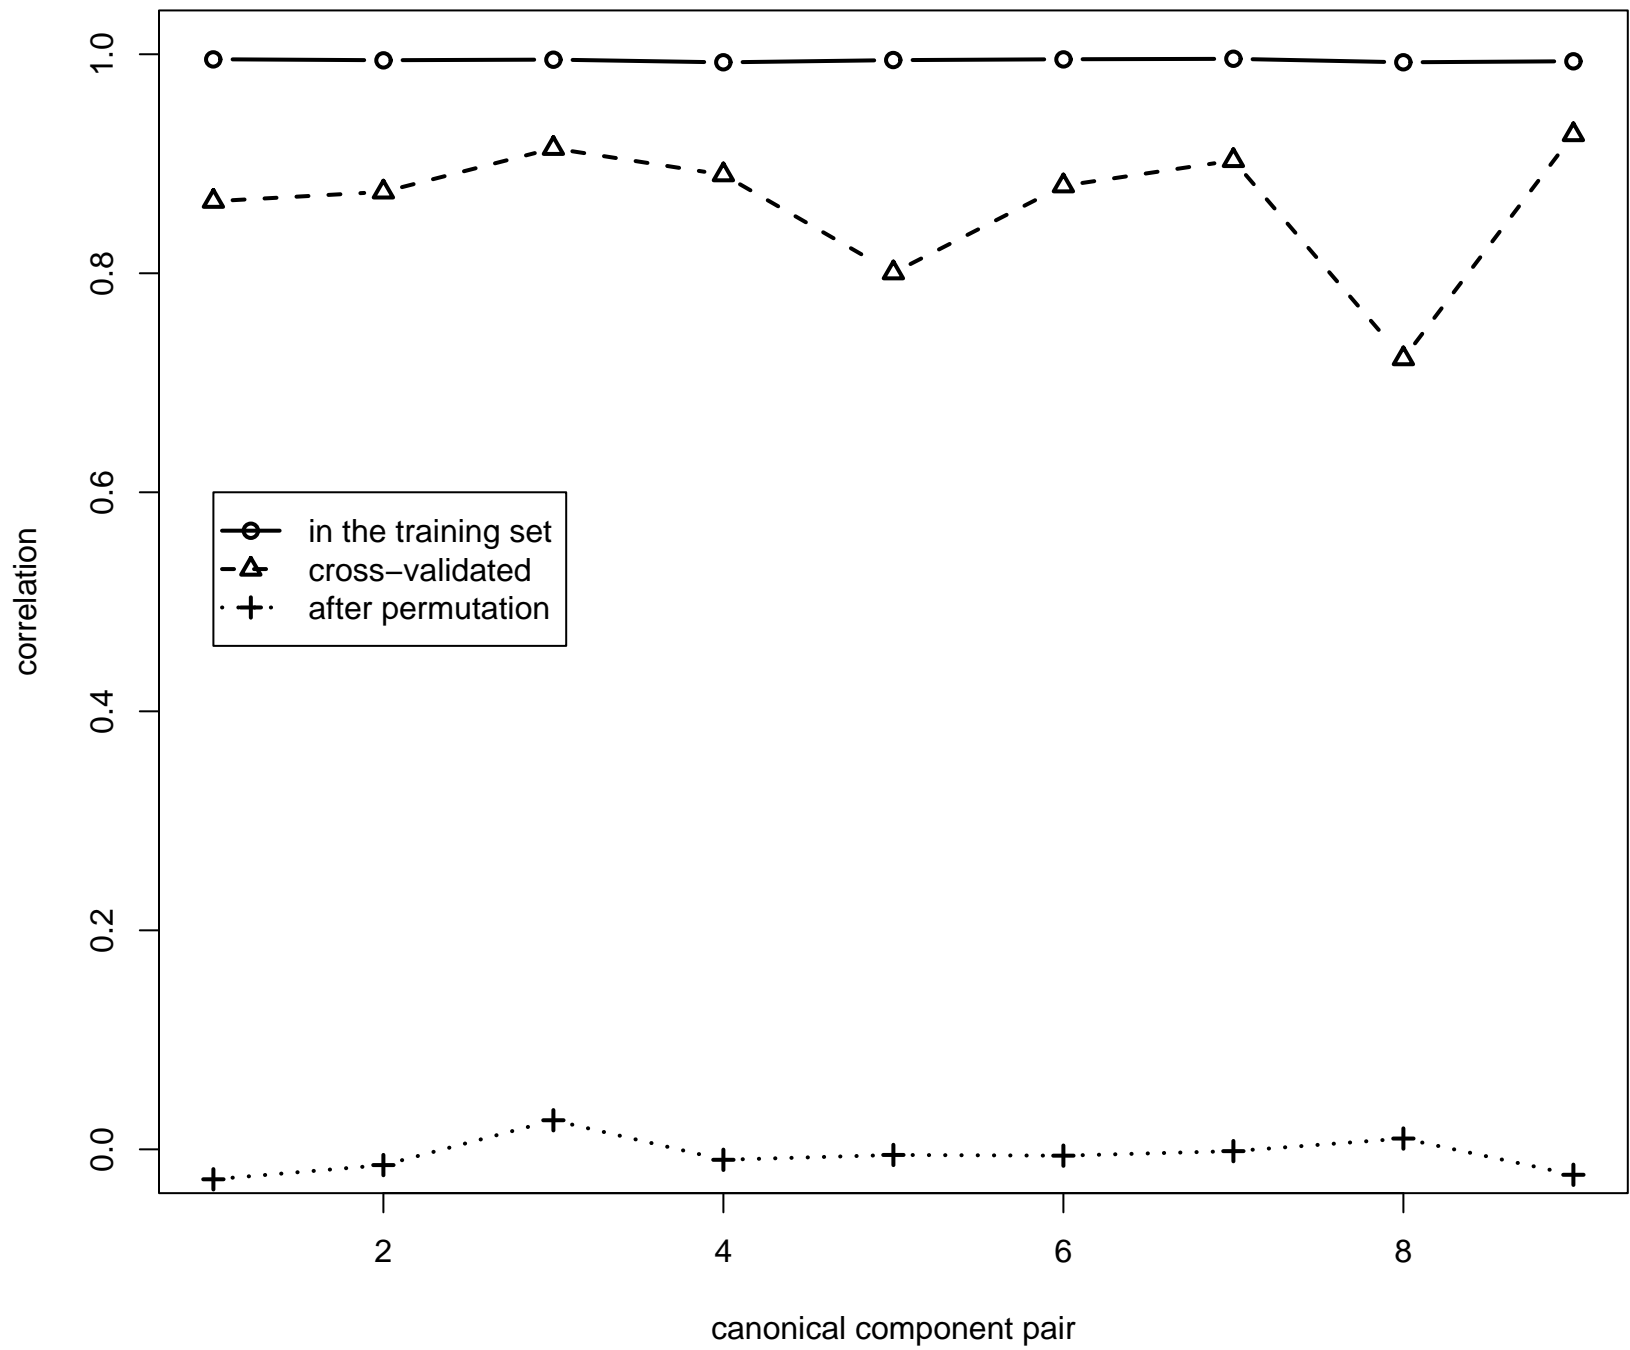

Supplement: 12859_2009_3045_MOESM4_ESM.pdf [file 12859_2009_3045_MOESM4_ESM.pdf]
